# Supplementary material for: Electronic-structure-based material descriptors: (in)dependence on self-interaction and Hartree–Fock exchange
Source: Royal Society of Chemistry journal article supplement (doi:10.1039/c4cc10427g), 2015-01-01
Supplement: c4cc10427g1.pdf [file c4cc10427g1.pdf]

## **Electronic-Structure-Based Chemical Descriptors: (In)dependence on Self-Interaction and Hartree-Fock Exchange**

Almudena Notario-Estévez. Sergey M. Kozlov. Francesc Viñes.\* and Francesc Illas

*Departament de Química Física & Institut de Química Teòrica i Computacional (IQTCUB).  
Universitat de Barcelona. c/Martí i Franquès 1.08028 Barcelona. Spain.*

\*[francesc.vines@ub.edu](mailto:francesc.vines@ub.edu)

### **Computational Details**

Periodic bulk calculations based on the Kohn-Sham formalism of Density Functional Theory (*DFT*) were carried out using the VASP program package.<sup>1</sup> In this work we considered one functional from each rung of the Jacob's ladder. Among many possibilities we selected functionals that were shown to be the best suited for the description of geometric, energetic, and elastic properties of bulk transition metals according to a recent systematic study.<sup>2</sup> Namely, we used the Vosko-Wilk-Nusair (*VWN*)<sup>3</sup> *xc* within the Local Spin Density Approximation (*LSDA*), the Perdew-Burke-Ernzerhof (*PBE*)<sup>4</sup> within the Generalized Gradient Approximation (*GGA*), the Tao-Perdew-Staroverov-Scuseria (*TPSS*) meta-GGA,<sup>5</sup> and the Heyd-Scuseria-Ernzerhof (HSE06) hybrid functional.<sup>6</sup> Optimized bulk structures are taken from the literature<sup>2,7</sup> and we refer there for further computational details. Here single-point calculations were carried out using Projector Augmented Wave (*PAW*) method<sup>8</sup> to represent atomic cores, and an optimized cutoff of 415 eV was chosen for the plane wave basis set.

- 
- 1 G. Kresse and J. Furthmüller, *Phys. Rev.*, 1996, B **54**, 11169-11186.
  - 2 P. Janthon. S. Luo. S. M. Kozlov. F. Viñes. J. Limtrakul. D. G. Truhlar and F. Illas, *J. Chem. Theory Comput.*, 2014, **10**, 3832-3839.
  - 3 S. H. Vosko. L. Wilk and M. Nusair, *Can. J. Phys.*, 1980, **58**, 1200-1211.
  - 4 J. P. Perdew. K. Burke and M. Ernzerhof, *Phys. Rev. Lett.*, 1996, **77**, 3865-3869.
  - 5 J. Tao. J. P. Perdew. V. N. Staroverov and G. E. Scuseria, *Phys. Rev. Lett.*, 2003, **91**, 146401-146404.
  - 6 A. V. Krukau. O. A. Vydrov. A. F. Izmaylov and G. E. Scuseria, *J. Chem. Phys.*, 2006, **125**, 224106-224106.
  - 7 P. Janthon. S. M. Kozlov. F. Viñes. J. Limtrakul and F. Illas, *J. Chem. Theory Comput.*, 2013, **9**, 1631-1640.
  - 8 P. E. Blöchl, *Phys. Rev. B*, 1994, **50**, 17953-17978.

The convergence criterion of the self-consistency process was set to  $10^{-6}$  eV. Monkhorst-Pack  $\mathbf{k}$ -point grids<sup>9</sup> were increased with respect to previous calculations to  $11 \times 11 \times 11$  ( $3 \times 3 \times 3$  in the case of Mn unit cell with 58 atoms). 20 bands were explicitly calculated per bulk atom, ensuring a suited description of the number of occupied and virtual states, yet 40 bands were needed for La. A tetrahedron method with Blöchl corrections was used to gain the Density Of States (*DOS*), with a smearing of 0.05 eV. The *d*-band analysis has been carried out on the Projected DOS (*PDOS*). The DOS has been evaluated on nearly 10.000 energy points, ensuring an energy resolution better than 0.01 eV. The *d*-band center,  $\epsilon_d$ , has been obtained calculating the gravimetric center of *d*-states, integrating PDOS from the *d*-band onset energy level,  $\epsilon_l$ , until the upper edge energy,  $\epsilon_f$ , i.e. the energy that would yield full occupation of the *d*-PDOS. The *d*-band center is here referred to the Fermi energy,  $\epsilon_F$ , used as zero energy reference. The band width  $W$  has been obtained from the subtraction of  $\epsilon_i$  from  $\epsilon_f$ . Finally, transition metal function,  $\epsilon_u$ , has been determined equaling it to the highest peak energy position of the Hilbert transform of the *d*-PDOS. For few metals two peaks are competing as a function of the employed *xc* functional. In these cases the highest energy peak has been consistently used. Further details are provided in the literature.<sup>10</sup>

---

9 H. J. Monkhorst and J. D. Pack, *Phys. Rev. B*, 1976, **13**, 5188-5192.

10 H. Xin, A. Vojvodic, J. Voss, J. K. Nørskov and F. Abild-Pedersen, *Phys. Rev. B*, 2014, **89**, 115114-115118.

**Table S1** List of calculated  $d$ -band centers,  $\epsilon_d$ , in eV, for all transition metal bulks, gained using different  $xc$  functionals.

| Metal | VWN   | PBE   | TPSS  | HSE06  |
|-------|-------|-------|-------|--------|
| Sc    | 4.53  | 4.18  | 4.13  | 3.50   |
| Ti    | 3.18  | 2.96  | 3.17  | 2.90   |
| V     | 3.99  | 3.88  | 4.06  | 4.46   |
| Cr    | -0.46 | -0.48 | -0.48 | -0.42  |
| Mn    | 0.77  | 0.69  | 0.90  | -0.22  |
| Fe    | 0.52  | 0.53  | 0.47  | -0.43  |
| Co    | -0.26 | -0.33 | -0.32 | -1.54  |
| Ni    | -0.64 | -0.64 | -0.75 | -2.02  |
| Cu    | -2.91 | -2.86 | -3.08 | -4.06  |
| Zn    | -7.58 | -7.69 | -7.83 | -9.49  |
| Y     | 4.41  | 4.78  | 4.14  | 4.48   |
| Zr    | 3.27  | 3.18  | 3.27  | 3.12   |
| Nb    | 1.23  | 1.23  | 1.25  | 1.45   |
| Mo    | -0.48 | -0.41 | -0.39 | -0.02  |
| Tc    | -0.72 | -0.65 | -0.65 | -0.75  |
| Ru    | -1.86 | -1.73 | -1.79 | -2.13  |
| Rh    | -2.25 | -2.19 | -2.23 | -2.60  |
| Pd    | -2.45 | -2.42 | -2.45 | -2.79  |
| Ag    | -4.44 | -4.39 | -4.56 | -5.55  |
| Cd    | -9.05 | -9.16 | -8.93 | -10.49 |
| La    | 7.86  | 7.71  | 8.50  | 7.14   |
| Hf    | 3.16  | 3.07  | 3.09  | 3.29   |
| Ta    | 3.16  | 2.97  | 2.91  | 3.30   |
| W     | 2.03  | 1.94  | 1.90  | 2.32   |
| Re    | 1.10  | 1.02  | 1.00  | 1.42   |
| Os    | -0.75 | -0.80 | -0.79 | -1.01  |
| Ir    | -1.55 | -1.52 | -1.44 | -1.80  |
| Pt    | -2.77 | -2.73 | -2.87 | -3.29  |
| Au    | -3.88 | -3.83 | -4.08 | -4.78  |
| Hg    | -5.34 | -5.26 | -6.18 | -6.68  |

**Table S2** List of calculated  $d$ -band widths,  $W$ , in eV, for all transition metal bulks gained using different  $xc$  functionals.

| Metal | VWN   | PBE   | TPSS  | HSE06 |
|-------|-------|-------|-------|-------|
| Sc    | 21.98 | 20.91 | 19.75 | 14.02 |
| Ti    | 21.38 | 20.14 | 20.75 | 19.44 |
| V     | 23.62 | 23.79 | 24.04 | 25.82 |
| Cr    | 8.82  | 8.51  | 8.85  | 10.28 |
| Mn    | 22.02 | 21.46 | 23.30 | 26.59 |
| Fe    | 20.81 | 20.29 | 20.85 | 22.22 |
| Co    | 21.21 | 21.00 | 21.54 | 23.57 |
| Ni    | 20.99 | 20.99 | 21.11 | 22.47 |
| Cu    | 7.32  | 7.23  | 7.52  | 7.83  |
| Zn    | 9.18  | 9.15  | 9.83  | 11.14 |
| Y     | 17.12 | 19.78 | 15.06 | 15.72 |
| Zr    | 17.37 | 16.74 | 16.89 | 16.40 |
| Nb    | 9.62  | 9.55  | 9.55  | 10.87 |
| Mo    | 9.10  | 9.65  | 9.95  | 11.46 |
| Tc    | 11.10 | 11.08 | 11.65 | 13.82 |
| Ru    | 10.30 | 11.48 | 11.56 | 13.68 |
| Rh    | 10.06 | 10.71 | 10.77 | 12.88 |
| Pd    | 6.03  | 5.98  | 5.84  | 6.11  |
| Ag    | 6.86  | 6.92  | 6.92  | 7.64  |
| Cd    | 9.69  | 9.76  | 9.96  | 11.54 |
| La    | 27.23 | 26.81 | 29.66 | 25.23 |
| Hf    | 16.90 | 15.97 | 15.86 | 16.17 |
| Ta    | 18.76 | 18.34 | 17.35 | 18.99 |
| W     | 25.99 | 25.32 | 24.87 | 29.65 |
| Re    | 24.37 | 23.76 | 23.36 | 27.68 |
| Os    | 22.65 | 22.43 | 23.09 | 25.44 |
| Ir    | 23.16 | 22.94 | 22.94 | 25.32 |
| Pt    | 10.07 | 10.11 | 10.52 | 11.93 |
| Au    | 7.95  | 7.85  | 8.11  | 8.97  |
| Hg    | 5.87  | 5.90  | 6.98  | 7.37  |

**Table S3** List of calculated upper  $d$ -band edges,  $\epsilon_u$ , in eV, for all transition metal bulks, gained using different  $xc$  functionals.

| Metal | VWN   | PBE   | TPSS  | HSE06  |
|-------|-------|-------|-------|--------|
| Sc    | 3.88  | 3.93  | 4.10  | 4.81   |
| Ti    | 3.49  | 3.48  | 3.65  | 4.24   |
| V     | 2.82  | 2.83  | 2.92  | 3.91   |
| Cr    | 1.47  | 1.50  | 1.51  | 2.67   |
| Mn    | 1.53  | 1.52  | 1.96  | 2.28   |
| Fe    | 1.73  | 2.04  | 2.03  | 3.83   |
| Co    | 1.27  | 1.30  | 1.36  | 1.97   |
| Ni    | 0.14  | 0.14  | 0.29  | 1.11   |
| Cu    | -1.59 | -1.57 | -1.65 | -2.64  |
| Zn    | -6.88 | -6.82 | -7.20 | -8.98  |
| Y     | 5.92  | 5.96  | 6.18  | 6.58   |
| Zr    | 5.14  | 5.16  | 5.32  | 5.82   |
| Nb    | 4.03  | 4.06  | 4.13  | 4.94   |
| Mo    | 2.3   | 2.35  | 2.47  | 3.21   |
| Tc    | 3.26  | 3.26  | 3.35  | 4.09   |
| Ru    | 1.78  | 1.78  | 1.81  | 2.30   |
| Rh    | 0.86  | 0.87  | 0.87  | 1.01   |
| Pd    | 0.22  | 0.21  | 0.21  | 0.08   |
| Ag    | -2.96 | -3.05 | -3.05 | -4.02  |
| Cd    | -8.11 | -8.21 | -8.28 | -10.04 |
| La    | 6.16  | 6.13  | 6.45  | 6.74   |
| Hf    | 6.69  | 6.73  | 6.78  | 7.44   |
| Ta    | 4.95  | 5.05  | 5.13  | 5.92   |
| W     | 3.12  | 3.18  | 3.20  | 4.04   |
| Re    | 4.34  | 4.35  | 4.36  | 5.21   |
| Os    | 2.41  | 2.41  | 2.47  | 3.02   |
| Ir    | 1.29  | 1.29  | 1.27  | 1.73   |
| Pt    | 0.34  | 0.34  | 0.39  | 0.55   |
| Au    | -1.73 | -1.77 | -1.81 | -2.72  |
| Hg    | -4.80 | -4.85 | -5.33 | -6.31  |
